# Supplementary material for: Characterization of Plasma-Derived Small Extracellular Vesicles Indicates Ongoing Endothelial and Platelet Activation in Patients with Thrombotic Antiphospholipid Syndrome
Source: PubMed Central journal article supplement (PMC7290474; doi:10.3390/cells9051211), 2020-05-13
Supplement: cells-09-01211-s001.pdf [file cells-09-01211-s001.pdf]

**Supplementary Table S1.** List of 37 markers used in the MACSPlex Exosome Kit and their cellular expression.

| <b>Marker</b> | <b>Aliases</b>                  | <b>Cellular expression</b>                                                                                                                                                                                           |
|---------------|---------------------------------|----------------------------------------------------------------------------------------------------------------------------------------------------------------------------------------------------------------------|
| CD1c          | BDCA-1                          | Major population of myeloid DCs                                                                                                                                                                                      |
| CD2           | LFA-2                           | Thymocytes, NK cells, T- and B-cells                                                                                                                                                                                 |
| CD3           | CD3d molecule                   | Mature T-cells, thymocytes, subset of NK cells                                                                                                                                                                       |
| CD4           | CD4 molecule                    | Thymocyte subsets, T helper cells, regulatory T cells, monocytes, macrophages                                                                                                                                        |
| CD8           | CD8 molecule                    | Thymocyte subsets, cytotoxic T cells, subset of NK cells, myeloid DC                                                                                                                                                 |
| CD9           | TSPAN29, P24, MIC3              | sEVs marker<br>Platelets, pre-B-cells, eosinophils, basophils, activated T-cells, endothelial and epithelial cells                                                                                                   |
| CD11c         | ITGAX                           | Monocytes, macrophages, granulocytes, NK cells, myeloid DCs, subset of B- and T-cell                                                                                                                                 |
| CD14          | CD14 molecule                   | Monocytes, macrophages, subset of neutrophils and myeloid DCs, Langerhans cells, and granulocytes                                                                                                                    |
| CD19          | CD19 molecule                   | B-cells and follicular DC                                                                                                                                                                                            |
| CD20          | MS4A1                           | T- and B-cell subsets                                                                                                                                                                                                |
| CD24          | Heat stable antigen (HSA)       | B-cells, granulocytes, epithelial cells, monocytes, neutrophils, neuroblasts                                                                                                                                         |
| CD25          | IL2RA                           | Activated T- and B-cells, some thymocytes, regulatory T cells, oligodendrocytes, and macrophages                                                                                                                     |
| CD29          | ITGB1                           | Leukocytes                                                                                                                                                                                                           |
| CD31          | PECAM-1                         | Monocytes, platelets, granulocytes, endothelial cells, lymphocyte subsets, and epithelial cells                                                                                                                      |
| CD40          | CD40 molecule                   | B-cells, monocytes, macrophages, follicular DC, endothelial cells, fibroblasts, and keratinocytes                                                                                                                    |
| CD41b         | ITGA2B                          | Megakaryocytes and platelets                                                                                                                                                                                         |
| CD42a         | GP9                             | Megakaryocytes and platelets                                                                                                                                                                                         |
| CD44          | CD44 molecule                   | Cancer stem cells, hematopoietic, fibroblastic, and glial cells                                                                                                                                                      |
| CD45          | Leukocyte common antigen, PTPRC | Hematopoietic cells (except erythrocytes and platelets)                                                                                                                                                              |
| CD49e         | ITGA5                           | Thymocytes, T-cells, early activated B-cells, monocytes, platelets, fibroblasts, endothelial, and epithelial cells                                                                                                   |
| CD56          | NCAM1                           | NK cells and T-cell subsets                                                                                                                                                                                          |
| CD62P         | SELP                            | Activated endothelial cells, platelets and megakaryocytes                                                                                                                                                            |
| CD63          | LAMP-3, MLA1                    | sEVs marker<br>Activated platelets, monocytes, macrophages, granulocytes, and endothelial cells                                                                                                                      |
| CD69          | CD69 molecule                   | Activated leukocytes, NK cells, thymocyte subsets, platelets, Langerhans cells, and activated macrophages                                                                                                            |
| CD81          | TAPA1, Tetraspanin-28           | sEVs marker<br>B- and T-cells, NK cells, monocytes, thymocytes, DCs, endothelial cells, and fibroblasts                                                                                                              |
| CD86          | CD86 molecule                   | Activated T- and B-cells, monocytes, DCs, and endothelial cells                                                                                                                                                      |
| CD105         | ENG                             | Mature endothelial cells, mesenchymal stem cells, erythroid precursors, activated monocytes and macrophages                                                                                                          |
| CD133/1       | PROM1                           | Multipotent progenitor cells; including immature hematopoietic stem and progenitor cells, circulation endothelial progenitor cells, fetal neural stem cells, other tissue-specific stem cells, and cancer stem cells |
| CD142         | F3; TF                          | Activated endothelial cells, epithelial cells, monocytes, macrophages, platelets, astrocytes, and Schwann cells                                                                                                      |
| CD146         | MCAM, MUC18, Mel-CAM            | Endothelial cells, pericytes, smooth muscle cells, follicular DC, melanoma cells, subpopulation of activated T-cells, marrow stromal cells (MSCs)                                                                    |
| CD209         | DC-SIGN                         | DC, placental macrophages, endothelial cells of placental vascular channels, peripheral blood mononuclear cells                                                                                                      |
| CD326         | EpCAM                           | Embryonic stem cells, epithelial cells in tissues, some circulating tumor cells, and cancer stem cells                                                                                                               |
| HLA-ABC       |                                 | APC                                                                                                                                                                                                                  |

|            |                      |                   |
|------------|----------------------|-------------------|
| HLA-DRDPDQ |                      | APC               |
| MCSP       | CSPG4                | Some cancer cells |
| ROR1       | ROR1                 | Some cancer cells |
| SSEA-4     | Sialyl Lewis x, CD15 | Stem cell marker  |

Supplementary table 1 adapted from Koliha, 2016 [32] and <https://www.abcam.com/primary-antibodies/human-cd-antigen-guide>

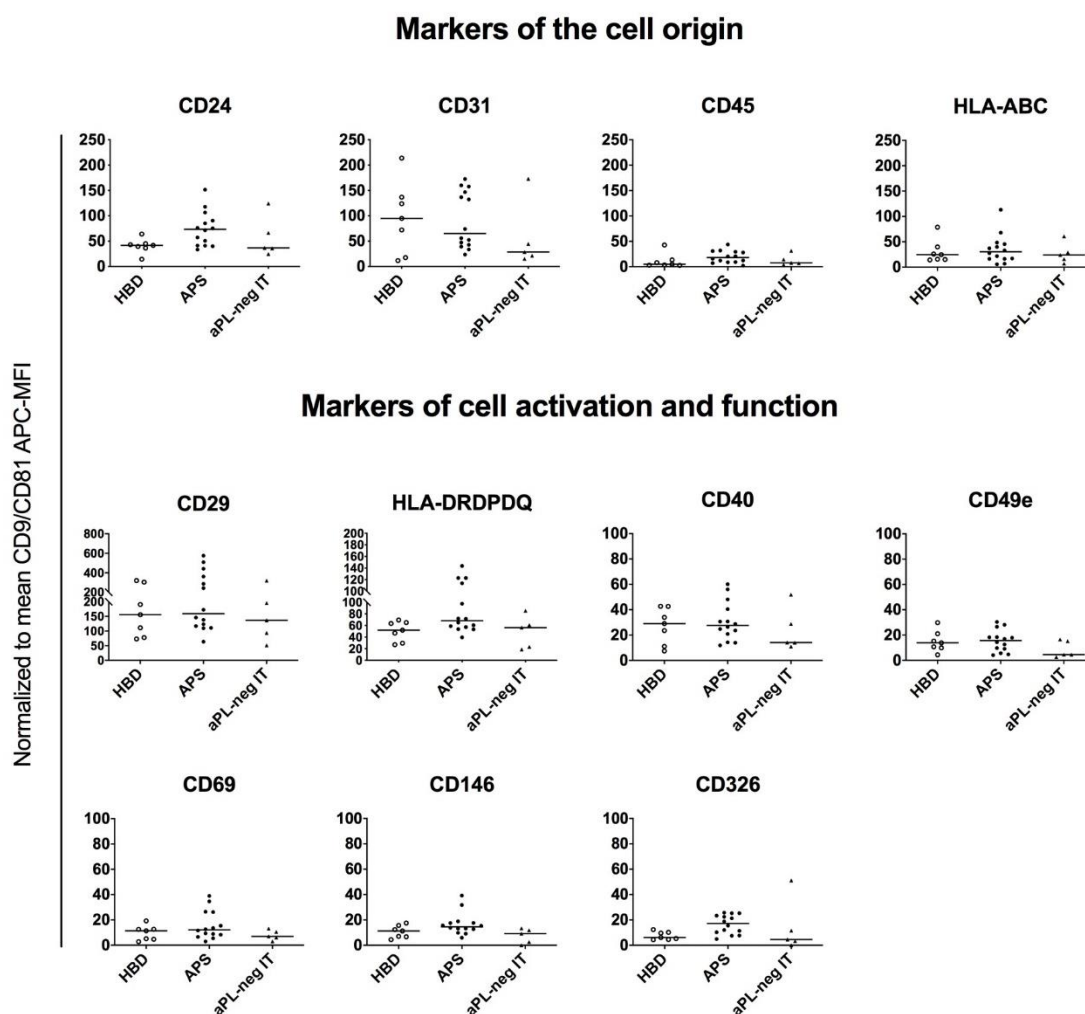

**Supplementary Figure S1.** Normalized median fluorescence intensities (MFI) of the surface protein profiles of the plasma-derived sEVs from healthy blood donors (HBD), patients with antiphospholipid syndrome (APS) and aPL-neg patients with idiopathic thrombosis (aPL-neg IT). The nonparametric Kruskal–Wallis test with Dunn’s multiple comparison adjustment was used. Grouped surface protein profiles are shown indicating the cell of origin (upper panel) and cell activation status/functional properties of the sEVs (lower panel).
